# Supplementary material
Source: publisher figshare collection journal article supplement (https://acs.figshare.com/ndownloader/files/4225438)
Supplement: Supplementary file 1 [file 4225438]

**$^1\text{H}$ - $^{13}\text{C}/^1\text{H}$ - $^{15}\text{N}$  Heteronuclear Dipolar Recoupling by R-Symmetry Sequences Under Fast Magic Angle Spinning for Dynamics Analysis of Biological and Organic Solids**

*Guangjin Hou,<sup>1,2</sup> In-Ja L. Byeon,<sup>2,3</sup> Jinwoo Ahn,<sup>2,3</sup> Angela M. Gronenborn,<sup>2,3</sup> Tatyana Polenova<sup>\*1,2</sup>*

<sup>1</sup>Department of Chemistry and Biochemistry, University of Delaware, Newark, Delaware 19716, United States

<sup>2</sup>Pittsburgh Center for HIV Protein Interactions, University of Pittsburgh School of Medicine, 1051 Biomedical Science Tower 3, 3501 Fifth Ave., Pittsburgh, PA 15261, United States

<sup>3</sup>Department of Structural Biology, University of Pittsburgh School of Medicine, 1051 Biomedical Science Tower 3, 3501 Fifth Ave., Pittsburgh, PA 15261, United States

**Author e-mail address:** [hou@udel.edu](mailto:hou@udel.edu), [ilb6@pitt.edu](mailto:ilb6@pitt.edu), [jia12@pitt.edu](mailto:jia12@pitt.edu), [amg100@pitt.edu](mailto:amg100@pitt.edu), [tpolenov@udel.edu](mailto:tpolenov@udel.edu)

**Table S1.** Summary of R-symmetry sequences suitable for heteronuclear dipolar recoupling under fast MAS conditions,  $10 \leq N \leq 30$ , and  $1 < N/2n \leq 5.0^*$ .

| N  | $n$ | $\nu$ | $\omega_I/\omega_R$ | $K_{sc}$ |
|----|-----|-------|---------------------|----------|
| 10 | 3   | 1     | 1.667               | 0.2236   |
| 10 | 1   | 3     | 5                   | 0.3064   |
| 12 | 5   | 4     | 1.2                 | 0.1550   |
| 14 | 2   | 3     | 3.5                 | 0.2946   |
| 14 | 3   | 1     | 2.333               | 0.2669   |
| 14 | 4   | 1     | 1.75                | 0.2314   |
| 14 | 5   | 3     | 1.4                 | 0.1907   |
| 14 | 6   | 5     | 1.167               | 0.1479   |
| 16 | 3   | 2     | 2.667               | 0.2785   |
| 16 | 5   | 2     | 1.6                 | 0.2165   |
| 16 | 7   | 6     | 1.143               | 0.1425   |
| 18 | 2   | 5     | 4.5                 | 0.3038   |
| 18 | 4   | 1     | 2.25                | 0.2634   |
| 18 | 5   | 1     | 1.8                 | 0.2356   |
| 18 | 7   | 5     | 1.286               | 0.1718   |
| 18 | 8   | 7     | 1.125               | 0.1384   |
| 20 | 3   | 4     | 3.333               | 0.292    |
| 20 | 7   | 4     | 1.429               | 0.1949   |
| 20 | 9   | 8     | 1.111               | 0.1351   |
| 22 | 3   | 5     | 3.667               | 0.2967   |
| 22 | 4   | 3     | 2.75                | 0.2808   |
| 22 | 5   | 1     | 2.2                 | 0.2610   |
| 22 | 6   | 1     | 1.833               | 0.2383   |
| 22 | 7   | 3     | 1.571               | 0.2134   |
| 22 | 8   | 5     | 1.375               | 0.1869   |
| 22 | 9   | 7     | 1.222               | 0.1597   |
| 22 | 10  | 9     | 1.1                 | 0.1325   |
| 24 | 5   | 2     | 2.4                 | 0.2697   |
| 24 | 7   | 2     | 1.714               | 0.2281   |
| 24 | 11  | 10    | 1.091               | 0.1303   |
| 26 | 3   | 7     | 4.333               | 0.3028   |
| 26 | 4   | 5     | 3.25                | 0.2910   |
| 26 | 5   | 3     | 2.6                 | 0.2764   |
| 26 | 6   | 1     | 2.167               | 0.2593   |
| 26 | 7   | 1     | 1.857               | 0.2402   |

|    |    |    |       |        |
|----|----|----|-------|--------|
| 26 | 8  | 3  | 1.625 | 0.2193 |
| 26 | 9  | 5  | 1.444 | 0.1971 |
| 26 | 10 | 7  | 1.3   | 0.1742 |
| 26 | 11 | 9  | 1.182 | 0.1512 |
| 26 | 12 | 11 | 1.083 | 0.1283 |
| 28 | 3  | 8  | 4.667 | 0.3048 |
| 28 | 5  | 4  | 2.8   | 0.2820 |
| 28 | 9  | 4  | 1.556 | 0.2115 |
| 28 | 11 | 8  | 1.273 | 0.1694 |
| 28 | 13 | 12 | 1.077 | 0.1268 |
| 30 | 4  | 7  | 3.75  | 0.2977 |
| 30 | 7  | 1  | 2.143 | 0.2581 |
| 30 | 8  | 1  | 1.875 | 0.2414 |
| 30 | 11 | 7  | 1.364 | 0.1850 |
| 30 | 13 | 11 | 1.154 | 0.1451 |
| 30 | 14 | 13 | 1.071 | 0.1254 |
| 4  | 1  | 4  | 2     | 0.5    |

\*  $N$ ,  $n$ , and  $\nu$  are the symmetry numbers associated with each sequence.  $w_1$  and  $w_R$  denote the RF field strength and the MAS frequency, respectively.  $K_{sc}$  is the effective scaling factor of the dipolar lineshape recoupled by a specific symmetry sequence.

**Table S2.**  $^1\text{H}$ - $^{13}\text{C}^\alpha$  dipolar coupling constants for each residue in the CAP-Gly domain of dynactin, extracted from the 3D R16<sub>3</sub><sup>2</sup> DIPSHIFT experiment conducted at the MAS frequency of 40 kHz.

| Residue # | $^1\text{H}$ - $^{13}\text{C}$ dipolar coupling (kHz) | $\chi^2$ | Secondary structure |
|-----------|-------------------------------------------------------|----------|---------------------|
| L27       | 19.6 ± 0.3                                            | 0.59     | Loop                |
| S31       | 20.5 ± 0.2                                            | 0.51     | Loop                |
| I36       | 19.3 ± 0.2                                            | 1.51     | Loop                |
| R41       | 21.2 ± 0.3                                            | 1.03     | β-Sheet             |
| G42       | 20.8 ± 0.2                                            | 0.54     | β-Sheet             |
| T43       | 20.8 ± 0.2                                            | 0.46     | β-Sheet             |
| V44       | 20.7 ± 0.4                                            | 2.95     | β-Sheet             |
| V47       | 21.2 ± 0.2                                            | 0.39     | β-Sheet             |
| G48       | 20.6 ± 0.2                                            | 0.81     | β-Sheet             |
| A49       | 19.4 ± 0.2                                            | 1.48     | Terminus of β-Sheet |
| T50       | 20.2 ± 0.2                                            | 0.83     | Loop                |
| L51       | 20.0 ± 0.3                                            | 2.07     | Loop                |
| T54       | 19.2 ± 0.2                                            | 1.82     | Loop                |
| K56       | 19.2 ± 0.2                                            | 0.62     | Turn                |
| V60       | 20.8 ± 0.2                                            | 0.74     | β-Sheet             |
| I61       | 20.7 ± 0.4                                            | 2.54     | β-Sheet             |
| L62       | 19.3 ± 0.5                                            | 3.45     | Terminus of β-Sheet |
| D63       | 19.0 ± 0.4                                            | 1.72     | Loop                |
| A65       | 21.0 ± 0.2                                            | 0.68     | Loop                |
| K68       | 19.2 ± 0.3                                            | 2.89     | Loop                |
| N69       | 19.9 ± 0.2                                            | 0.26     | Loop                |
| D70       | 19.9 ± 0.2                                            | 0.29     | Loop                |
| T72       | 21.2 ± 0.2                                            | 0.20     | β-Sheet             |
| V73       | 19.5 ± 0.3                                            | 2.14     | Loop                |
| Q74       | 19.2 ± 0.3                                            | 1.66     | Loop                |
| R76       | 20.7 ± 0.2                                            | 0.65     | β-Sheet             |
| K77       | 19.4 ± 0.2                                            | 0.39     | Terminus of β-Sheet |
| T80       | 20.0 ± 0.4                                            | 3.16     | Loop                |
| C81       | 19.2 ± 0.2                                            | 1.09     | Loop                |
| D82       | 19.2 ± 0.2                                            | 0.48     | Loop                |
| E83       | 19.3 ± 0.3                                            | 1.76     | Loop                |
| H85       | 19.4 ± 0.6                                            | 4.04     | Loop                |
| I87       | 20.9 ± 0.3                                            | 2.05     | β-Sheet             |
| V89       | 18.9 ± 0.2                                            | 0.58     | Terminus of β-Sheet |
| Q91       | 19.2 ± 0.2                                            | 1.76     | Loop                |
| Q93       | 19.2 ± 0.3                                            | 1.67     | Loop                |
| I94       | 21.8 ± 0.2                                            | 1.11     | β-Sheet             |

(a)

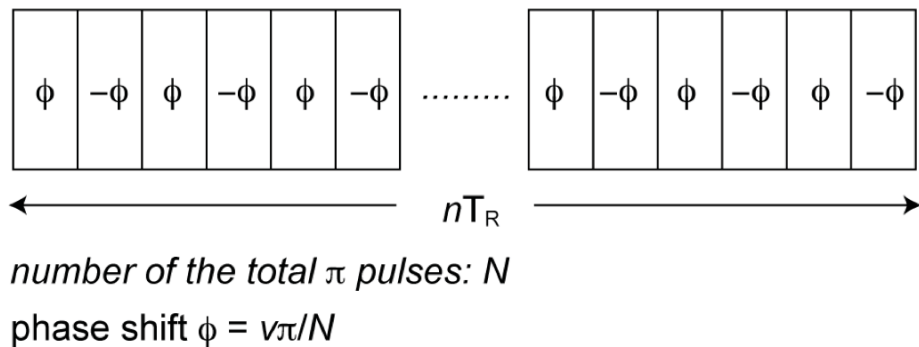

(b)

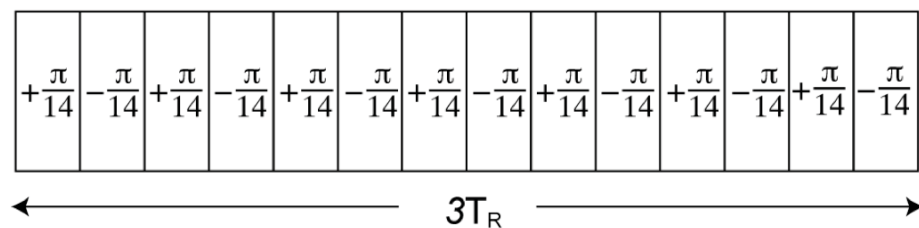

**Figure S1.** (a) Schematic representation of  $RN_n^v$  symmetry sequences. Each square denotes one  $\pi$  pulse, and  $\phi$  denotes the phase of  $\pi$  pulse. (b) An example of R-type symmetry sequence,  $R14_3^1$ . In this sequence, 14  $\pi$  pulses are contained in 3 rotor periods; the phase is  $\pm \pi/14$ , and the rf field strength is  $7/3\omega_R$ .

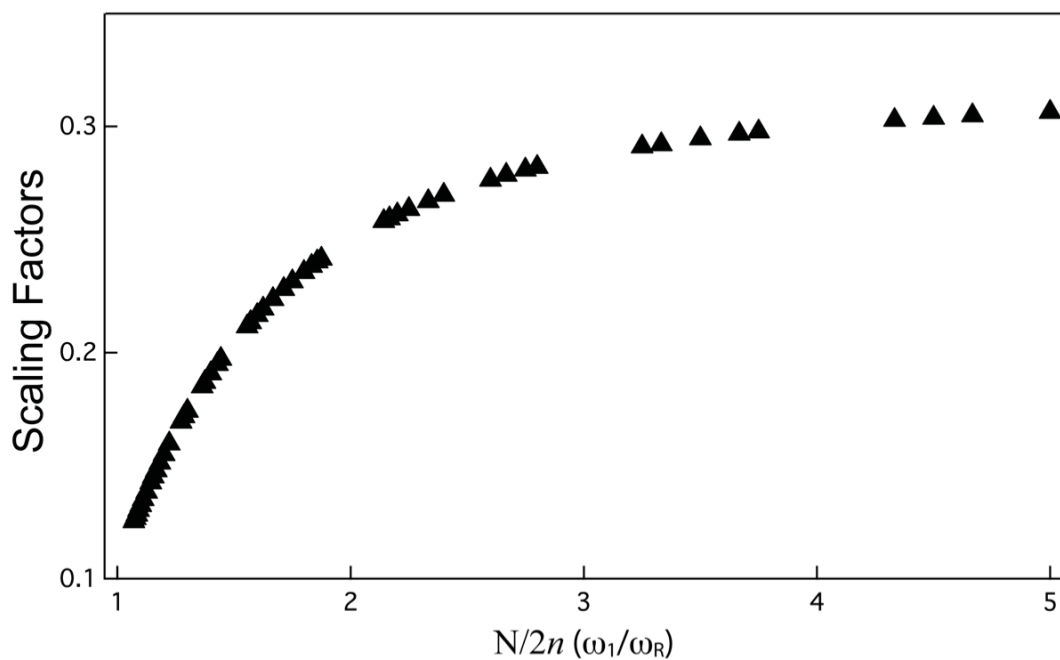

**Figure S2.** Effective scaling factors for  $\gamma$ -encoded dipolar recoupling  $RN_n^v$  symmetry sequences plotted as a function of the ratio of the symmetry numbers,  $N/2n$ .  $\pi$  pulses were used as the basic R elements, and the corresponding symmetry sequences are listed in Table S1. The ratio of  $N/2n$  determines the required rf field strength,  $\omega_1 = N\omega_R/2n$ .

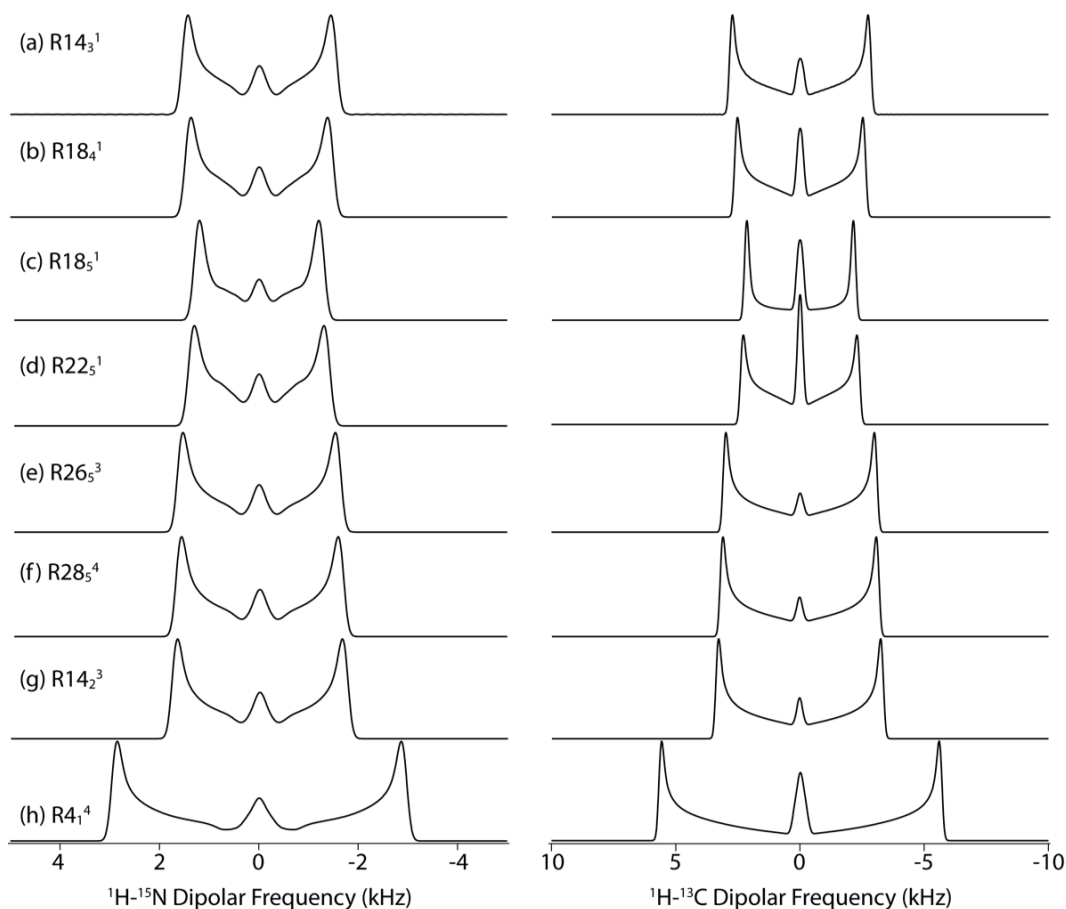

**Figure S3.** Simulated  $^1\text{H}$ - $^{15}\text{N}$  (left) and  $^1\text{H}$ - $^{13}\text{C}$  (right) dipolar lineshapes recoupled by (a)  $\text{R14}_3^1$ , (b)  $\text{R18}_4^1$ , (c)  $\text{R18}_5^1$ , (d)  $\text{R22}_5^1$ , (e)  $\text{R26}_5^3$ , (f)  $\text{R28}_5^4$ , (g)  $\text{R14}_2^3$ , and (h)  $\text{R4}_1^4$  symmetry sequences at the MAS frequency of 40 kHz.  $\pi$  pulses were used as the basic R elements, and the applied RF field strengths were 93.3, 90, 72, 88, 104, 112, 140, and 80 kHz in (a)-(h), respectively. Isolated H-N and H-C spin pairs were used for  $^1\text{H}$ - $^{15}\text{N}$  and  $^1\text{H}$ - $^{13}\text{C}$   $\text{RN}_n^v$  dipolar simulations, respectively. The one-bond heteronuclear dipolar couplings were 11.8 kHz for  $^1\text{H}$ - $^{15}\text{N}$  and 22.7 kHz for  $^1\text{H}$ - $^{13}\text{C}$ .  $^1\text{H}$  CSA parameters were: i)  $\delta_c = 10.0$  ppm and  $\eta = 1$  for the NH proton, and ii)  $\delta_c = 2.0$  ppm and  $\eta = 1$  for the CH proton. The  $\delta_{zz}$  principal component of the CSA tensor was assumed to lie along the dipolar vector. 986 ZCW ( $\alpha$ ,  $\beta$ ) orientations and 3  $\gamma$  angles were used to generate a powder average for all  $\gamma$ -encoded  $\text{RN}_n^v$  symmetry sequences, except for the non- $\gamma$  encoded  $\text{R4}_1^4$ , where the same ZCW angle set and 64  $\gamma$  angles were employed.

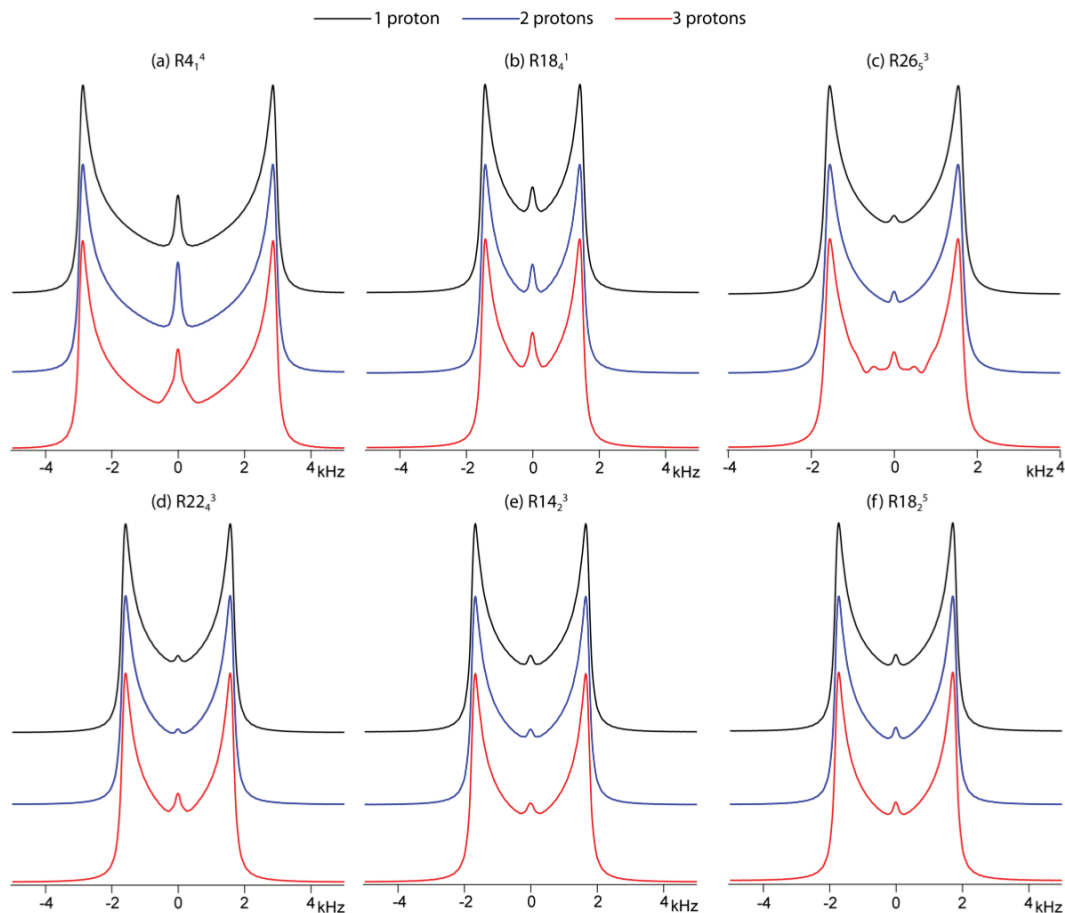

**Figure S4.** Simulated  $^1\text{H}$ - $^{15}\text{N}$  dipolar lineshapes for isolated NH (black),  $\text{NH}_2$  with one remote proton (blue) and  $\text{NH}_3$  with two remote protons (red) spin systems, recoupled by (a)  $\text{R}4_1^4$ , (b)  $\text{R}18_4^1$ , (c)  $\text{R}26_5^3$ , (d)  $\text{R}22_4^3$ , (e)  $\text{R}14_2^3$ , and (f)  $\text{R}18_2^5$  symmetry sequences at a MAS frequency of 40 kHz.  $\pi$  pulses were used as the basic R elements, and the applied RF field strengths were 80, 90, 104, 110, 140, and 180 kHz in (a)-(f), respectively. All simulation parameters except the spin system were same as Figure S3, and the geometry was i)  $d_{\text{N-H}} = 1.01 \text{ \AA}$  for NH spin system; ii)  $d_{\text{N-H1}} = 1.01 \text{ \AA}$ ,  $d_{\text{N-H2}} = 2.48 \text{ \AA}$ , and  $d_{\text{H1-H2}} = 2.64 \text{ \AA}$  for  $\text{NH}_2$  spin system; iii)  $d_{\text{N-H1}} = 1.01 \text{ \AA}$ ,  $d_{\text{N-H2}} = 2.48 \text{ \AA}$ ,  $d_{\text{N-H3}} = 2.48 \text{ \AA}$ ,  $d_{\text{H1-H2}} = 2.64 \text{ \AA}$ ,  $d_{\text{H1-H3}} = 2.64 \text{ \AA}$ , and  $d_{\text{H2-H3}} = 1.96 \text{ \AA}$  for  $\text{NH}_3$  spin system.



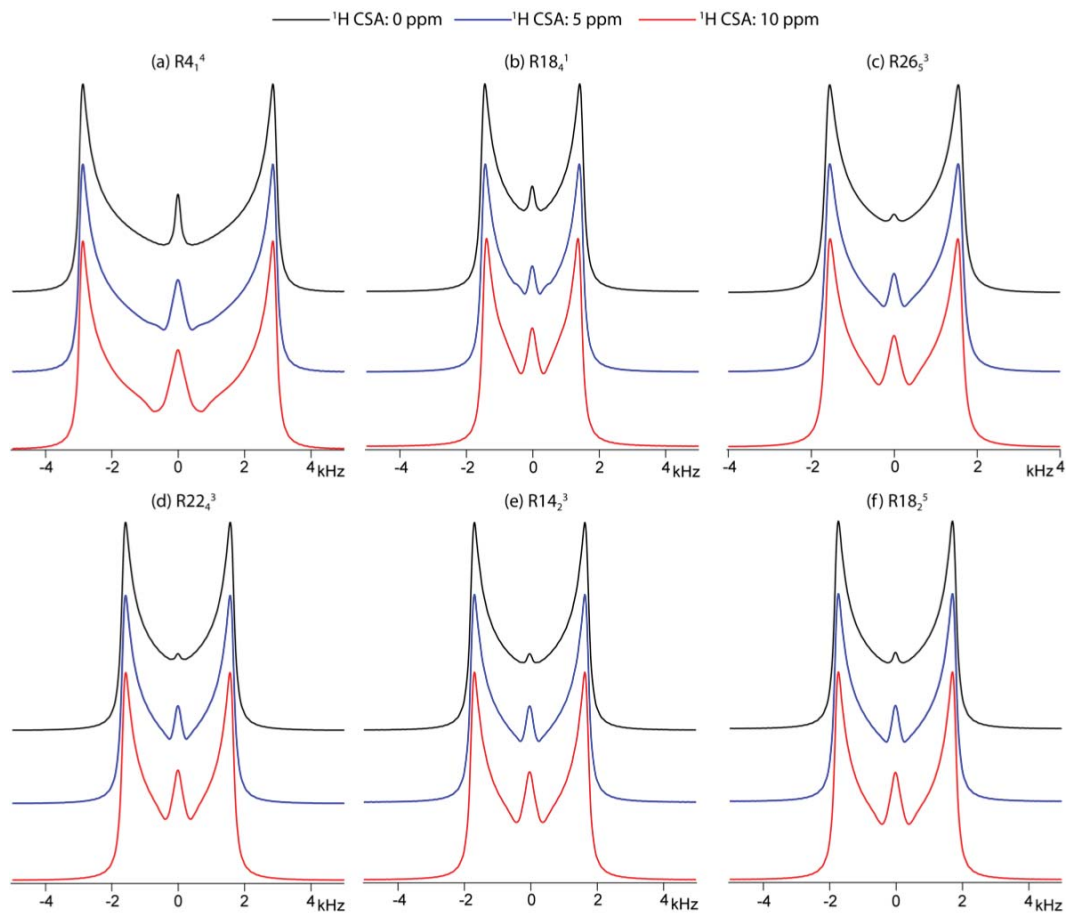

**Figure S5.** Simulated  $^1\text{H}$ - $^{15}\text{N}$  dipolar lineshapes for isolated N-H spin system containing amide proton CSA, with reduced shift anisotropy  $\delta_\sigma$  of 0 ppm (black), 5 ppm (blue) and 10 ppm (red), recoupled by (a)  $\text{R4}_1^4$ , (b)  $\text{R18}_4^1$ , (c)  $\text{R26}_5^3$ , (d)  $\text{R22}_4^3$ , (e)  $\text{R14}_2^3$ , and (f)  $\text{R18}_2^5$  symmetry sequences at the MAS frequency of 40 kHz. All simulation parameters except spin systems are the same as in Figure S4.

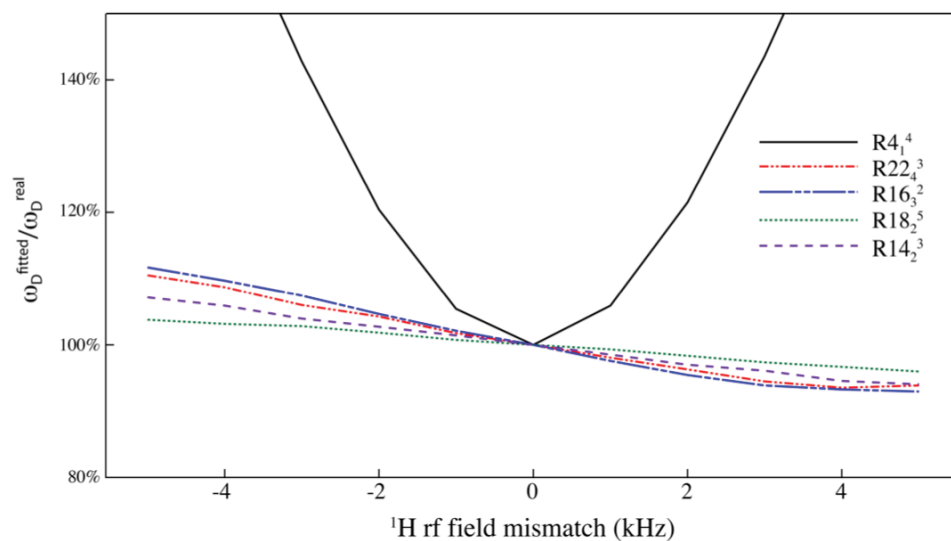

**Figure S6.** The influence of the mismatch of <sup>1</sup>H rf field strength on the accuracy of the <sup>1</sup>H-<sup>15</sup>N dipolar measurement with various symmetry sequences, R22<sub>4</sub><sup>3</sup> (red), R16<sub>3</sub><sup>2</sup> (blue), R18<sub>2</sub><sup>5</sup> (green), and R14<sub>2</sub><sup>3</sup> (purple). All simulation parameters except the rf field strength are the same as in Figure S4.

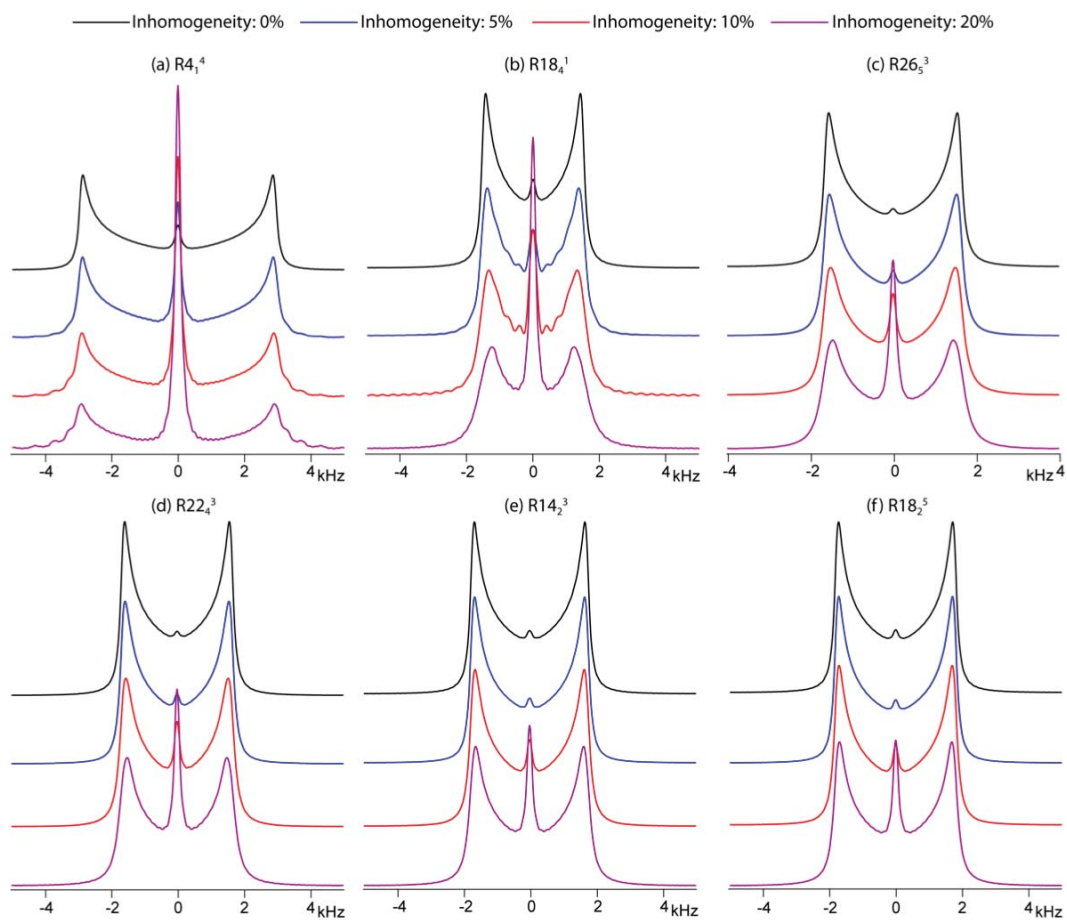

**Figure S7.** Simulated  $^1\text{H}$ - $^{15}\text{N}$  dipolar lineshapes for isolated NH spin system with rf field homogeneity of 100% (black), 95% (blue), 90% (red) and 80% (purple), recoupled by (a)  $\text{R}4_1^4$ , (b)  $\text{R}18_4^1$ , (c)  $\text{R}26_5^3$ , (d)  $\text{R}22_4^3$ , (e)  $\text{R}14_2^3$ , and (f)  $\text{R}18_2^5$  symmetry sequences at the MAS frequency of 40 kHz. Lorentzian distribution was employed to simulate the effect of the RF field inhomogeneity. All other simulation parameters are the same as in Figure S4.

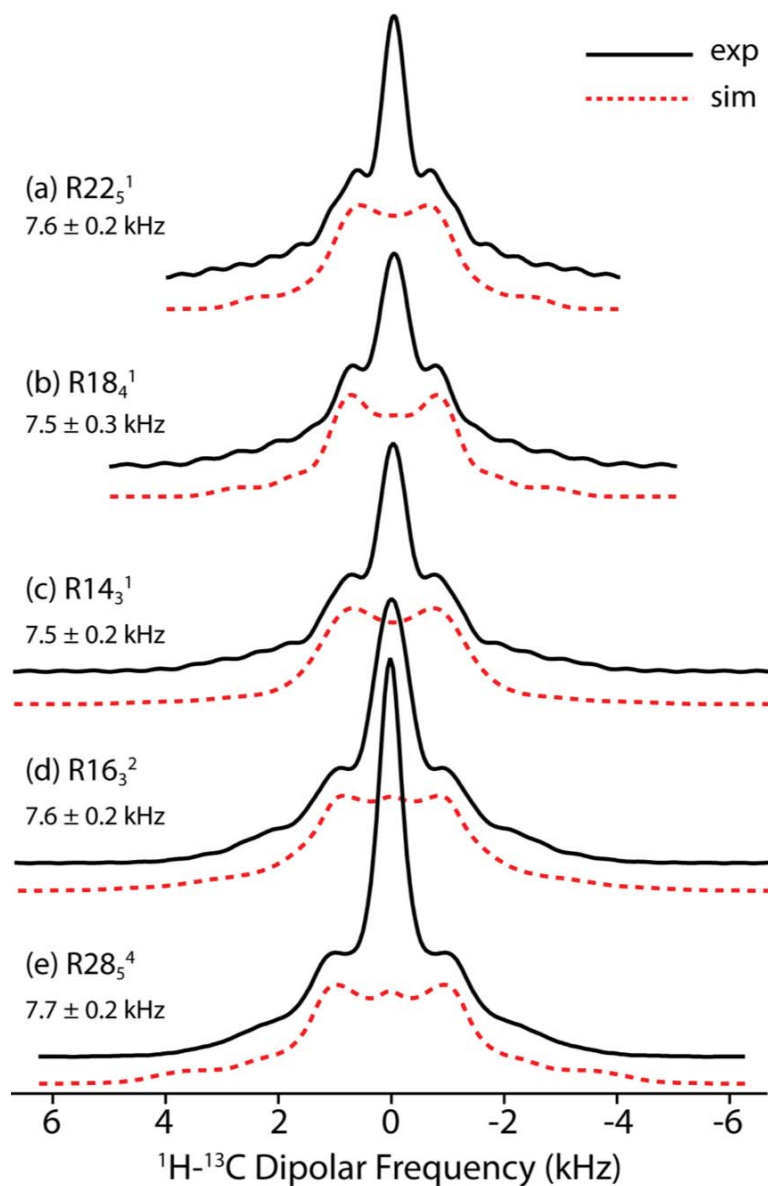

**Figure S8.** Black solid lines: experimental  $^1\text{H}$ - $^{13}\text{C}$  dipolar lineshapes of the  $\text{CH}_3$  groups in  $\text{U-}^{13}\text{C},^{15}\text{N}$ -alanine recorded at the MAS frequency of 40 kHz using (a)  $\text{R22}_5^1$ , (b)  $\text{R18}_4^1$ , (c)  $\text{R14}_3^1$ , (d)  $\text{R16}_3^2$ , and (e)  $\text{R28}_5^4$  symmetry sequences. During the dipolar evolution period  $t_1$ , the  $^1\text{H}$  RF field irradiation strength is 88, 90, 93.3, 106.7, and 112 kHz for (a)-(e), respectively. Red dashed lines: simulated best-fit  $^1\text{H}$ - $^{13}\text{C}$  dipolar lineshapes. The dipolar coupling constants extracted from the experimental lineshapes are indicated next to each spectrum.

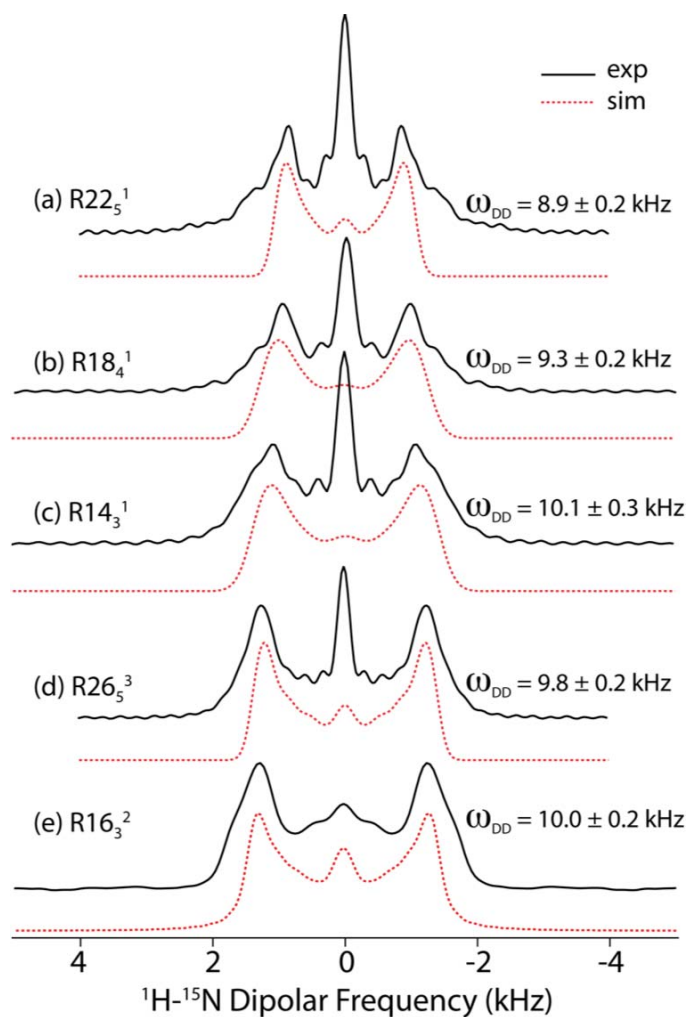

**Figure S9.** Solid lines: Experimental  $^1\text{H}$ - $^{15}\text{N}$  dipolar lineshapes in [ $^{15}\text{N}$ ]-N-acetylvaline (NAV) recorded at the MAS frequency of 40 kHz, using (a)  $\text{R}22_5^1$ , (b)  $\text{R}18_4^1$ , (c)  $\text{R}14_3^1$ , (d)  $\text{R}26_5^3$  and (e)  $\text{R}16_3^2$  symmetry sequences. The  $^1\text{H}$  rf field strength applied during the symmetry pulse irradiation was 88, 90, 93, 104, and 106.7 kHz for (a)-(e), respectively. Dotted lines: Simulated best-fit  $^1\text{H}$ - $^{15}\text{N}$  dipolar patterns. The dipolar coupling constants extracted from the experimental lineshapes are indicated next to each spectrum.

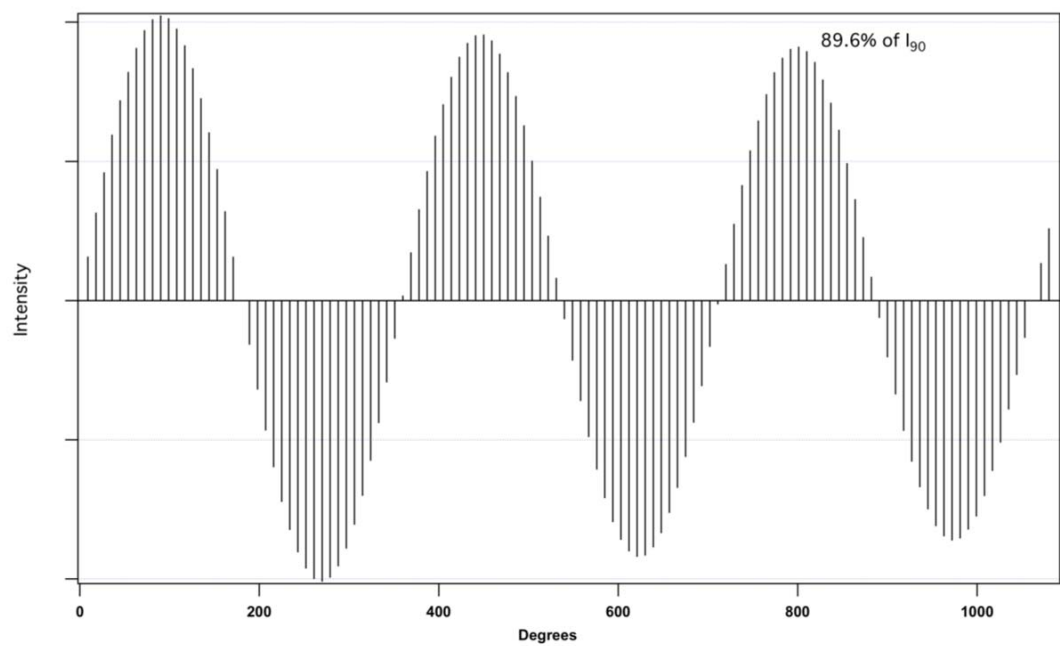

**Figure S10.** Nutation profile of the  $^{15}\text{N}$  CP magnetization of N-acetyl-valine (NAV) in our 1.8 mm fast MAS probe, The signal intensity is plotted as a function of the  $^1\text{H}$  excitation pulse angle. The rf field homogeneity measured as  $I_{810}/I_{90}$ , is 89.6%.

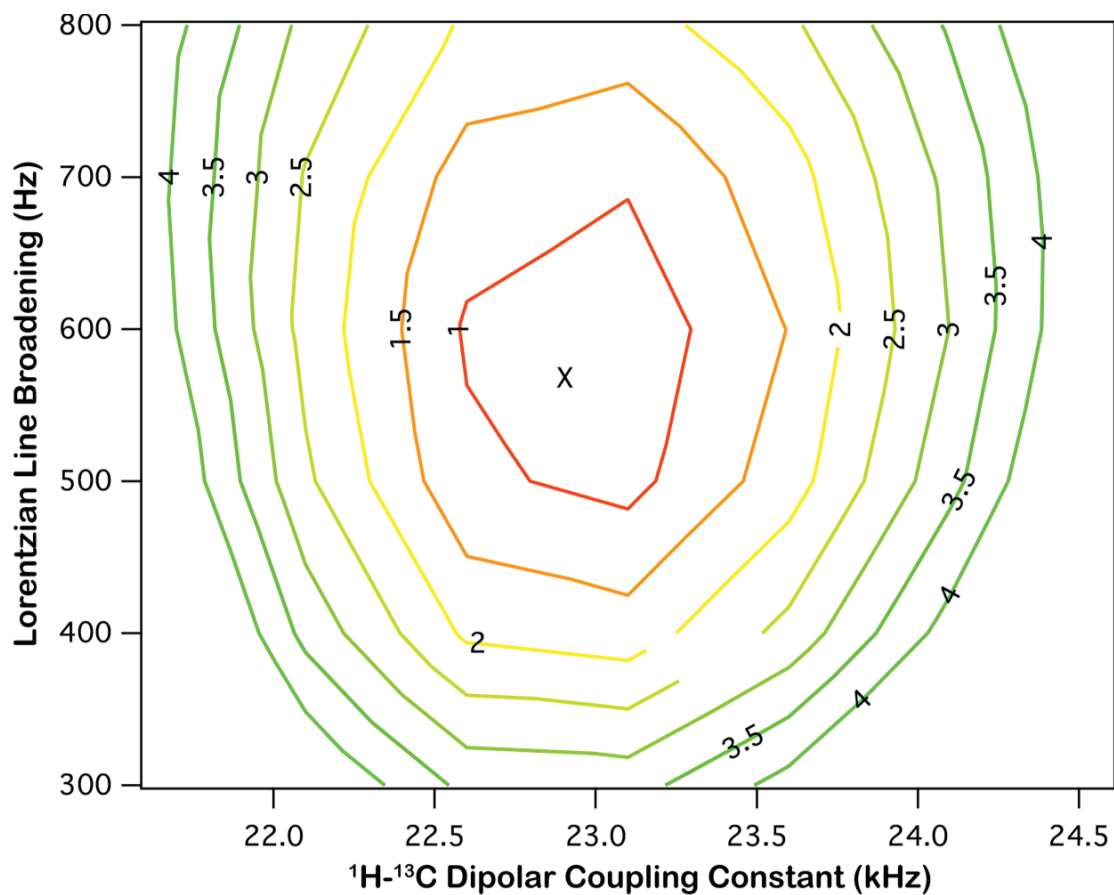

**Figure S11.** Contour plot for the least square error criterion  $\chi^2$  from the Simplex fitting of  $^1\text{H}$ - $^{13}\text{C}$  dipolar lineshape of Tyr 164 in  $[\text{U-}^{13}\text{C}, ^{15}\text{N}]$ -Tyr HIV-1 C-terminal domain (CTD) of CA protein, recorded by  $\text{R16}_3^2$  at the MAS frequency of 40 kHz, as a function of dipolar coupling constant ( $\omega_D$ ) and Lorentzian line broadening (LB). The best-fit parameters are  $\omega_D = 22.8 \pm 0.3$  kHz and  $\text{LB} = 573 \pm 112$  Hz, indicated by the cross symbol.

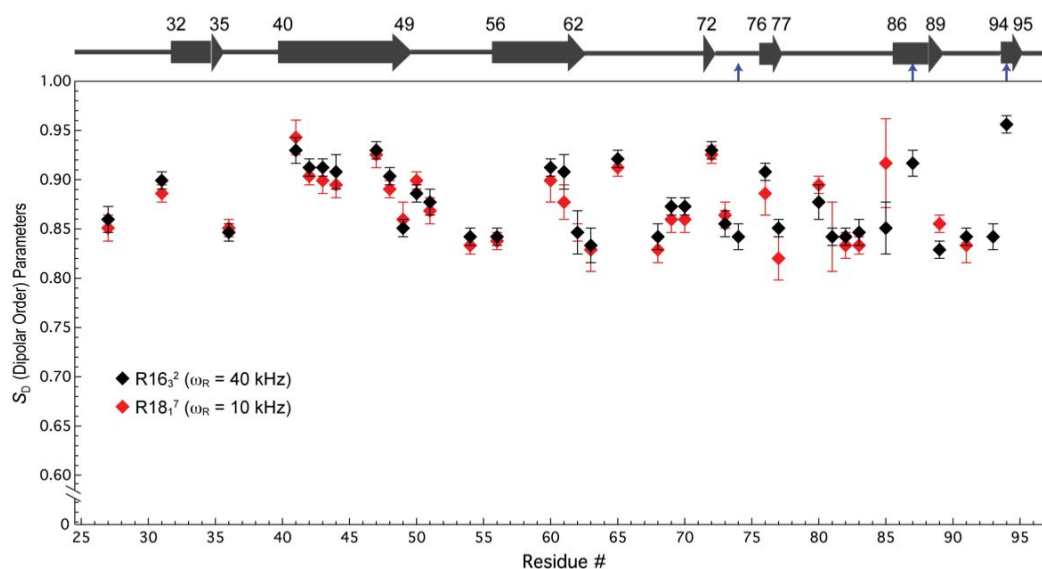

**Figure S12.** Overlay of the experimental H-C $^{\alpha}$  dipolar order parameters plotted as a function of the residue number for the sparsely- $^{13}\text{C}/\text{U}-^{15}\text{N}$  enriched CAP-Gly domain of dynactin, recorded by  $R16_3^2$  symmetry sequence at the MAS frequency of 40 kHz (black), and by  $R18_1^7$  symmetry sequence at the MAS frequency of 10 kHz (red). Ignoring the missing residue (marked as blue arrow bars) in the  $R18_1^7$ -based DIPSHIFT measurement, the average deviation in the derived dipolar order parameter between the two measurements is 0.012, corresponding to the deviation in the dipolar coupling constant of 270 Hz. The excellent agreement between these measurements demonstrates that the heteronuclear dipolar coupling measurements by R-type symmetry sequences at fast MAS frequencies are accurate and robust.
